# Supplementary material for: A serendipitous isolation of cocrystallized platinum–tin complexes: synthesis, structure and theoretical exploration
Source: Royal Society of Chemistry journal article supplement (doi:10.1039/d0nj04639f), 2020-01-01
Supplement: d0nj04639f1.pdf [file d0nj04639f1.pdf]

## Supplementary Information

### **A Serendipitous Isolation of Cocrystalized Platinum-Tin Complexes: Synthesis, Structure and Theoretical Exploration**

Rohit Singh Chauhan<sup>\*a</sup>, Saurabh Kumar Singh<sup>\*b</sup>, Adish Tyagi<sup>c</sup>, James A. Golen<sup>d</sup>, Arnold L. Rheingold

<sup>a</sup>Department of Chemistry, K. J. Somaiya College of Science and Commerce, Mumbai- 400 077

Email: [rohit.chauhan@somaiya.edu](mailto:rohit.chauhan@somaiya.edu)

<sup>b</sup>Department of Chemistry, Indian Institute of Technology Hyderabad, Kandi-502285, Sangareddy, Telangana, India

Email: [sksingh@chy.iith.ac.in](mailto:sksingh@chy.iith.ac.in)

<sup>c</sup>Chemistry Division, Bhabha Atomic Research Centre, Mumbai-400085, INDIA

<sup>d</sup>Department of Chemistry and Biochemistry, University of California, San Diego, La Jolla, California 92093-0358, United States.

## Supplementary Information

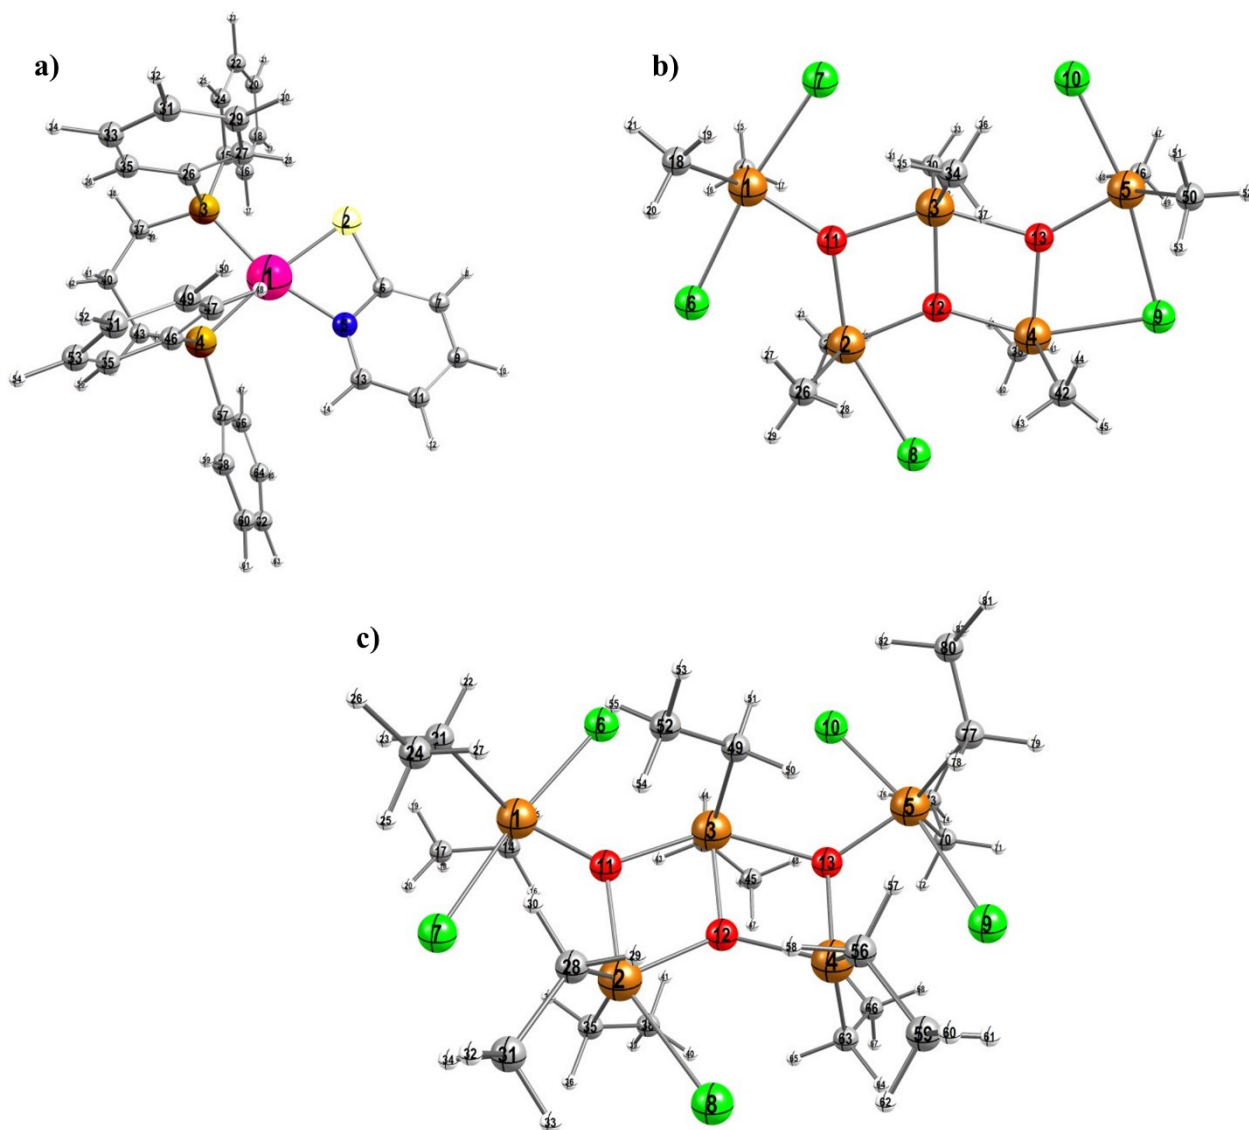

Figure S1. DFT optimized geometries a) [ $\{\text{Pt}(\kappa_2\text{-SeC}_5\text{H}_4\text{N})(\text{dppp})\}$ ]; b) [ $\{(\text{Me}_2\text{Sn})_5\text{O}_3\text{Cl}_5\}$ ]; c) [ $\{(\text{Me}_2\text{Sn})_5\text{O}_3\text{Cl}_5\}$ ]. The labelling of atoms are for comparing NPA charges and second order perturbation analysis donor-acceptor interaction analysis. Color code: Pt (pink), Sn (tangerine), P (light brown), Se (light yellow), Cl (green), O (red), N (blue), C (grey) and H (white).

## Supplementary Information

Table S1. NBO computed NPA charges on crystal structure and DFT optimized geometry of **[{Pt( $\kappa_2$ -SeC<sub>5</sub>H<sub>4</sub>N)(dppp)}]** unit of complex **2a**. Pt and atoms in first coordination sphere were kept in bold. (For numbering see Figure S1)

| Atoms       | <b>[{Pt(<math>\kappa_2</math>-SeC<sub>5</sub>H<sub>4</sub>N)(dppp)}]</b><br><i>(X-ray Crystal Structure)</i> | <b>[{Pt(<math>\kappa_2</math>-SeC<sub>5</sub>H<sub>4</sub>N)(dppp)}]</b><br><i>(DFT Optimized Geometry)</i> |
|-------------|--------------------------------------------------------------------------------------------------------------|-------------------------------------------------------------------------------------------------------------|
| <b>Pt 1</b> | <b>0.13772</b>                                                                                               | <b>0.14654</b>                                                                                              |
| <b>Se 2</b> | <b>-0.06074</b>                                                                                              | <b>-0.05301</b>                                                                                             |
| <b>P 3</b>  | <b>1.10344</b>                                                                                               | <b>1.09997</b>                                                                                              |
| <b>P 4</b>  | <b>1.02434</b>                                                                                               | <b>1.03107</b>                                                                                              |
| <b>N 5</b>  | <b>-0.55618</b>                                                                                              | <b>-0.57108</b>                                                                                             |
| C 6         | 0.07807                                                                                                      | 0.07738                                                                                                     |
| C 7         | -0.23095                                                                                                     | -0.27305                                                                                                    |
| H 8         | 0.21661                                                                                                      | 0.26914                                                                                                     |
| C 9         | -0.09103                                                                                                     | -0.16336                                                                                                    |
| H 10        | 0.20361                                                                                                      | 0.26198                                                                                                     |
| C 11        | -0.23445                                                                                                     | -0.28436                                                                                                    |
| H 12        | 0.20663                                                                                                      | 0.26224                                                                                                     |
| C 13        | 0.14653                                                                                                      | 0.08273                                                                                                     |
| H 14        | 0.18636                                                                                                      | 0.24367                                                                                                     |
| C 15        | -0.36143                                                                                                     | -0.36941                                                                                                    |
| C 16        | -0.18422                                                                                                     | -0.22953                                                                                                    |
| H 17        | 0.20419                                                                                                      | 0.25609                                                                                                     |
| C 18        | -0.15634                                                                                                     | -0.21946                                                                                                    |
| H 19        | 0.19962                                                                                                      | 0.25507                                                                                                     |
| C 20        | -0.15209                                                                                                     | -0.20777                                                                                                    |
| H 21        | 0.19739                                                                                                      | 0.25470                                                                                                     |
| C 22        | -0.16892                                                                                                     | -0.21991                                                                                                    |
| H 23        | 0.20041                                                                                                      | 0.25442                                                                                                     |
| C 24        | -0.15973                                                                                                     | -0.21700                                                                                                    |
| H 25        | 0.19758                                                                                                      | 0.25541                                                                                                     |
| C 26        | -0.36986                                                                                                     | -0.37056                                                                                                    |
| C 27        | -0.16269                                                                                                     | -0.21995                                                                                                    |
| H 28        | 0.20324                                                                                                      | 0.26372                                                                                                     |
| C 29        | -0.16504                                                                                                     | -0.22762                                                                                                    |
| H 30        | 0.20048                                                                                                      | 0.25531                                                                                                     |
| C 31        | -0.14855                                                                                                     | -0.21227                                                                                                    |
| H 32        | 0.19756                                                                                                      | 0.25403                                                                                                     |
| C 33        | -0.17425                                                                                                     | -0.21971                                                                                                    |
| H 34        | 0.20020                                                                                                      | 0.25404                                                                                                     |
| C 35        | -0.17679                                                                                                     | -0.22022                                                                                                    |
| H 36        | 0.19196                                                                                                      | 0.24175                                                                                                     |
| C 37        | -0.69499                                                                                                     | -0.75848                                                                                                    |
| H 38        | 0.24546                                                                                                      | 0.28473                                                                                                     |
| H 39        | 0.24714                                                                                                      | 0.28296                                                                                                     |
| C 40        | -0.38058                                                                                                     | -0.47744                                                                                                    |
| H 41        | 0.21276                                                                                                      | 0.25149                                                                                                     |
| H 42        | 0.22988                                                                                                      | 0.27222                                                                                                     |
| C 43        | -0.67133                                                                                                     | -0.74775                                                                                                    |
| H 44        | 0.23638                                                                                                      | 0.27804                                                                                                     |
| H 45        | 0.24075                                                                                                      | 0.27901                                                                                                     |
| C 46        | -0.37763                                                                                                     | -0.37946                                                                                                    |
| C 47        | -0.15417                                                                                                     | -0.21050                                                                                                    |
| H 48        | 0.20113                                                                                                      | 0.25723                                                                                                     |
| C 49        | -0.16305                                                                                                     | -0.22216                                                                                                    |
| H 50        | 0.19942                                                                                                      | 0.25503                                                                                                     |
| C 51        | -0.15755                                                                                                     | -0.20633                                                                                                    |
| H 52        | 0.19829                                                                                                      | 0.25417                                                                                                     |

## Supplementary Information

|      |          |          |
|------|----------|----------|
| C 53 | -0.16248 | -0.22494 |
| H 54 | 0.20108  | 0.25510  |
| C 55 | -0.17921 | -0.22945 |
| H 56 | 0.19685  | 0.24654  |
| C 57 | -0.37910 | -0.37284 |
| C 58 | -0.17235 | -0.22668 |
| H 59 | 0.20059  | 0.25967  |
| C 60 | -0.16371 | -0.22282 |
| H 61 | 0.20032  | 0.25658  |
| C 62 | -0.16555 | -0.21388 |
| H 63 | 0.20095  | 0.25657  |
| C 64 | -0.16341 | -0.22074 |
| H 65 | 0.20313  | 0.25681  |
| C 66 | -0.16855 | -0.22575 |
| H 67 | 0.19685  | 0.25206  |

## Supplementary Information

Table S2. NBO computed NPA charges on DFT optimized geometry of  $[\{\text{Pt}(\kappa_2\text{-SeC}_5\text{H}_4\text{N})(\text{dppp})\}]^+$  unit of complex **2a** and their isolated fragments  $\{\text{Pt}(\text{dppp})\}^{2+}$  and  $\{\text{SeC}_5\text{H}_4\text{N}\}$ . Pt and atoms in first coordination sphere were kept in bold.

| $[\{\text{Pt}(\kappa_2\text{-SeC}_5\text{H}_4\text{N})(\text{dppp})\}]^+$ | $\{\text{Pt}(\text{dppp})\}^{2+}$ | $\{\text{SeC}_5\text{H}_4\text{N}\}$ |
|---------------------------------------------------------------------------|-----------------------------------|--------------------------------------|
| <b>Pt 1 0.14654</b>                                                       | <b>Pt 1 0.13767</b>               | <b>Se 1 -0.51484</b>                 |
| <b>Se 2 -0.05301</b>                                                      | <b>P 2 1.21965</b>                | <b>N 2 -0.51253</b>                  |
| <b>P 3 1.09997</b>                                                        | <b>P 3 1.21039</b>                | C 3 0.04373                          |
| <b>P 4 1.03107</b>                                                        | C 4 -0.38763                      | C 4 -0.30171                         |
| <b>N 5 -0.57108</b>                                                       | C 5 -0.22044                      | H 5 0.23272                          |
| C 6 0.07738                                                               | H 6 0.24782                       | C 6 -0.23091                         |
| C 7 -0.27305                                                              | C 7 -0.20830                      | H 7 0.21427                          |
| H 8 0.26914                                                               | H 8 0.27281                       | C 8 -0.35558                         |
| C 9 -0.16336                                                              | C 9 -0.16501                      | H 9 0.20794                          |
| H 10 0.26198                                                              | H 10 0.27488                      | C 10 0.02201                         |
| C 11 -0.28436                                                             | C 11 -0.20125                     | H 11 0.19489                         |
| H 12 0.26224                                                              | H 12 0.27473                      |                                      |
| C 13 0.08273                                                              | C 13 -0.20482                     |                                      |
| H 14 0.24367                                                              | H 14 0.26522                      |                                      |
| C 15 -0.36941                                                             | C 15 -0.39364                     |                                      |
| C 16 -0.22953                                                             | C 16 -0.21857                     |                                      |
| H 17 0.25609                                                              | H 17 0.25249                      |                                      |
| C 18 -0.21946                                                             | C 18 -0.21637                     |                                      |
| H 19 0.25507                                                              | H 19 0.27192                      |                                      |
| C 20 -0.20777                                                             | C 20 -0.18116                     |                                      |
| H 21 0.25470                                                              | H 21 0.27229                      |                                      |
| C 22 -0.21991                                                             | C 22 -0.20690                     |                                      |
| H 23 0.25442                                                              | H 23 0.27119                      |                                      |
| C 24 -0.21700                                                             | C 24 -0.21059                     |                                      |
| H 25 0.25541                                                              | H 25 0.24881                      |                                      |
| C 26 -0.37056                                                             | C 26 -0.75895                     |                                      |
| C 27 -0.21995                                                             | H 27 0.31459                      |                                      |
| H 28 0.26372                                                              | H 28 0.29601                      |                                      |
| C 29 -0.22762                                                             | C 29 -0.48419                     |                                      |
| H 30 0.25531                                                              | H 30 0.25987                      |                                      |
| C 31 -0.21227                                                             | H 31 0.29568                      |                                      |
| H 32 0.25403                                                              | C 32 -0.75212                     |                                      |
| C 33 -0.21971                                                             | H 33 0.28994                      |                                      |
| H 34 0.25404                                                              | H 34 0.30952                      |                                      |
| C 35 -0.22022                                                             | C 35 -0.40244                     |                                      |
| H 36 0.24175                                                              | C 36 -0.21071                     |                                      |
| C 37 -0.75848                                                             | H 37 0.24761                      |                                      |
| H 38 0.28473                                                              | C 38 -0.21617                     |                                      |
| H 39 0.28296                                                              | H 39 0.26707                      |                                      |
| C 40 -0.47744                                                             | C 40 -0.18248                     |                                      |
| H 41 0.25149                                                              | H 41 0.27078                      |                                      |
| H 42 0.27222                                                              | C 42 -0.21001                     |                                      |
| C 43 -0.74775                                                             | H 43 0.27319                      |                                      |
| H 44 0.27804                                                              | C 44 -0.22529                     |                                      |
| H 45 0.27901                                                              | H 45 0.25487                      |                                      |
| C 46 -0.37946                                                             | C 46 -0.38546                     |                                      |
| C 47 -0.21050                                                             | C 47 -0.20136                     |                                      |
| H 48 0.25723                                                              | H 48 0.26556                      |                                      |
| C 49 -0.22216                                                             | C 49 -0.20213                     |                                      |
| H 50 0.25503                                                              | H 50 0.27449                      |                                      |
| C 51 -0.20633                                                             | C 51 -0.16173                     |                                      |
| H 52 0.25417                                                              | H 52 0.27481                      |                                      |
| C 53 -0.22494                                                             | C 53 -0.20910                     |                                      |

## Supplementary Information

|               |               |
|---------------|---------------|
| H 54 0.25510  | H 54 0.27288  |
| C 55 -0.22945 | C 55 -0.21791 |
| H 56 0.24654  | H 56 0.24800  |
| C 57 -0.37284 |               |
| C 58 -0.22668 |               |
| H 59 0.25967  |               |
| C 60 -0.22282 |               |
| H 61 0.25658  |               |
| C 62 -0.21388 |               |
| H 63 0.25657  |               |
| C 64 -0.22074 |               |
| H 65 0.25681  |               |
| C 66 -0.22575 |               |
| H 67 0.25206  |               |

Table S3. Second order perturbation calculated strength of donor acceptor interaction ( $n \rightarrow \sigma^*$ ) in [ $\{\text{Pt}(\kappa_2\text{-SeC}_5\text{H}_4\text{N})(\text{dppp})\}$ ] unit of complex **2a** along with details of corresponding lone pair and antibonding orbital with its occupancy.

| Fragments                                      | <i>Lp</i>       | M-L* type               | Occupancy<br>(M-L *) | $\Delta E_{\text{M-L}^*}$<br>(kcal/mole) |
|------------------------------------------------|-----------------|-------------------------|----------------------|------------------------------------------|
| {Pt(dppp)}/{SeC <sub>5</sub> H <sub>4</sub> N} | $n_{\text{Se}}$ | $\sigma^*(\text{Pt-P})$ | 0.556                | 147.1                                    |
|                                                | $n_{\text{N}}$  | $\sigma^*(\text{Pt-P})$ | 0.382                | 89.8                                     |

## Supplementary Information

Table S4. EDA analysis of [ $\{\text{Pt}(\kappa_2\text{-SeC}_5\text{H}_4\text{N})(\text{dppp})\}$ ] fragment of complex **2a** along with decomposed orbital interaction energies ( $E_{\text{orb}}$ ) for both crystal structure and DFT optimized geometry.

| Fragments                                                                                             | $E_{\text{int}}$<br>(kcal/mole)                            | $E_{\text{orb}}$<br>(kcal/mole) | $E_{\text{steric}}$<br>(kcal/mole) |
|-------------------------------------------------------------------------------------------------------|------------------------------------------------------------|---------------------------------|------------------------------------|
|                                                                                                       | -283.2                                                     | -164.7                          | -114.4                             |
|                                                                                                       | <i>Decomposed <math>E_{\text{orb}}</math> interactions</i> |                                 |                                    |
| $\{\text{Pt}(\text{dppp})\}/\{\kappa_2\text{-SeC}_5\text{H}_4\text{N}\}$<br>(X-ray crystal Structure) |                                                            | -81.3                           |                                    |
|                                                                                                       |                                                            | -37.0                           |                                    |
|                                                                                                       |                                                            | -9.2                            |                                    |
|                                                                                                       |                                                            | -8.0                            |                                    |
|                                                                                                       | -277.3                                                     | -164.3                          | -113.0                             |
|                                                                                                       | <i>Decomposed <math>E_{\text{orb}}</math> interactions</i> |                                 |                                    |
| $\{\text{Pt}(\text{dppp})\}/\{\kappa_2\text{-SeC}_5\text{H}_4\text{N}\}$<br>(DFT optimized structure) |                                                            | -77.5                           |                                    |
|                                                                                                       |                                                            | -37.8                           |                                    |
|                                                                                                       |                                                            | -8.2                            |                                    |
|                                                                                                       |                                                            | -8.0                            |                                    |

## Supplementary Information

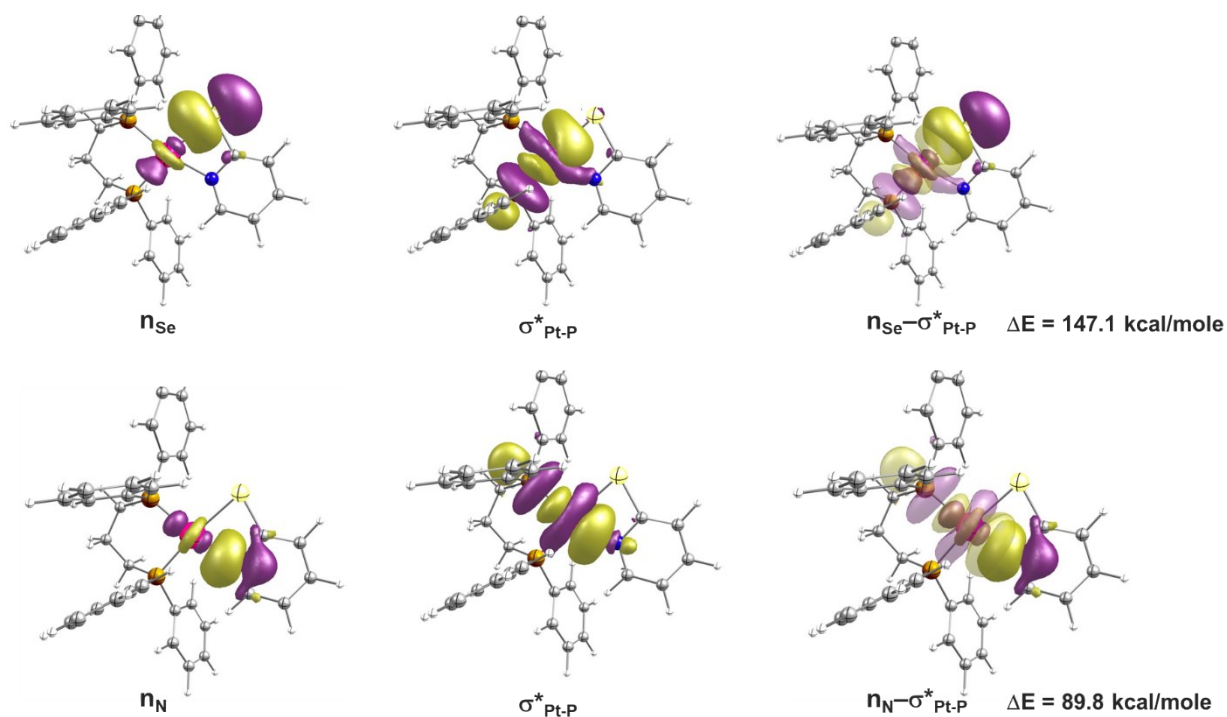

Figure S2. Second order perturbation theory computed two most stabilizing interactions present in  $[\{\text{Pt}(\kappa_2\text{-SeC}_5\text{H}_4\text{N})(\text{dppp})\}]$  unit of complex **2a**; Three-dimensional contour plots for 3c-4e bonding in (P-Pt...Se) which includes the lone pair of Se i.e. 1c/1e donor (left), formal  $\sigma^*\text{Pt-P}$  orbital (middle) and the overlap between the lone pair and  $\sigma^*\text{Pt-P}$  orbital is plotted on the right side; the figure below is for 3c-4e bonding in (P-Pt...N) interaction.



## Supplementary Information

Table S5. NBO computed NPA charges on crystal structure and DFT optimized geometry of  $[\{(\text{Me}_2\text{Sn})_5\text{O}_3\text{Cl}_5\}]$  unit of complex **2a**. (For numbering see Figure S1)

| Atoms | $[\{(\text{Me}_2\text{Sn})_5\text{O}_3\text{Cl}_5\}]$<br><i>(X-ray Crystal Structure)</i> | $[\{(\text{Me}_2\text{Sn})_5\text{O}_3\text{Cl}_5\}]$<br><i>(DFT Optimized Geometry)</i> |
|-------|-------------------------------------------------------------------------------------------|------------------------------------------------------------------------------------------|
| Sn    | 1.74902                                                                                   | 1.79094                                                                                  |
| Sn    | 1.90083                                                                                   | 1.91683                                                                                  |
| Sn    | 1.96910                                                                                   | 2.02771                                                                                  |
| Sn    | 1.90001                                                                                   | 1.97672                                                                                  |
| Sn    | 1.74532                                                                                   | 1.79731                                                                                  |
| Cl    | -0.66189                                                                                  | -0.64378                                                                                 |
| Cl    | -0.64394                                                                                  | -0.62379                                                                                 |
| Cl    | -0.71654                                                                                  | -0.65420                                                                                 |
| Cl    | -0.62504                                                                                  | -0.63232                                                                                 |
| Cl    | -0.59738                                                                                  | -0.59245                                                                                 |
| O     | -1.20264                                                                                  | -1.19467                                                                                 |
| O     | -1.21424                                                                                  | -1.21185                                                                                 |
| O     | -1.19626                                                                                  | -1.18400                                                                                 |
| C     | -1.02428                                                                                  | -1.15811                                                                                 |
| H     | 0.22659                                                                                   | 0.26378                                                                                  |
| H     | 0.22835                                                                                   | 0.25958                                                                                  |
| H     | 0.22781                                                                                   | 0.25877                                                                                  |
| C     | -1.03262                                                                                  | -1.15473                                                                                 |
| H     | 0.23387                                                                                   | 0.26108                                                                                  |
| H     | 0.23223                                                                                   | 0.26108                                                                                  |
| H     | 0.22525                                                                                   | 0.26062                                                                                  |
| C     | -1.03432                                                                                  | -1.16623                                                                                 |
| H     | 0.22900                                                                                   | 0.27309                                                                                  |
| H     | 0.23380                                                                                   | 0.26436                                                                                  |
| H     | 0.22202                                                                                   | 0.25143                                                                                  |
| C     | -1.04145                                                                                  | -1.15840                                                                                 |
| H     | 0.22739                                                                                   | 0.27240                                                                                  |
| H     | 0.22688                                                                                   | 0.25677                                                                                  |
| H     | 0.23572                                                                                   | 0.26241                                                                                  |
| C     | -1.04662                                                                                  | -1.17925                                                                                 |
| H     | 0.23182                                                                                   | 0.25986                                                                                  |
| H     | 0.22030                                                                                   | 0.24513                                                                                  |
| H     | 0.24212                                                                                   | 0.27573                                                                                  |
| C     | -1.04535                                                                                  | -1.17472                                                                                 |
| H     | 0.23289                                                                                   | 0.26263                                                                                  |
| H     | 0.24015                                                                                   | 0.27690                                                                                  |
| H     | 0.21815                                                                                   | 0.25327                                                                                  |
| C     | -1.03411                                                                                  | -1.17121                                                                                 |
| H     | 0.22798                                                                                   | 0.25617                                                                                  |
| H     | 0.24475                                                                                   | 0.26340                                                                                  |
| H     | 0.22983                                                                                   | 0.26752                                                                                  |
| C     | -1.03460                                                                                  | -1.17071                                                                                 |
| H     | 0.24302                                                                                   | 0.27344                                                                                  |
| H     | 0.22133                                                                                   | 0.25756                                                                                  |
| H     | 0.23162                                                                                   | 0.26407                                                                                  |
| C     | -1.02550                                                                                  | -1.15906                                                                                 |
| H     | 0.22976                                                                                   | 0.26052                                                                                  |
| H     | 0.23701                                                                                   | 0.26098                                                                                  |
| H     | 0.23426                                                                                   | 0.26511                                                                                  |
| C     | -1.01294                                                                                  | -1.15516                                                                                 |
| H     | 0.23386                                                                                   | 0.26168                                                                                  |
| H     | 0.22515                                                                                   | 0.26175                                                                                  |
| H     | 0.23252                                                                                   | 0.26406                                                                                  |

## Supplementary Information

Table S6. NBO computed NPA charges on crystal structure and DFT optimized geometry of  $[\{(\text{Et}_2\text{Sn})_5\text{O}_3\text{Cl}_5\}]$  unit of complex **2b**. (For numbering see Figure S1)

| Atoms | $[\{(\text{Et}_2\text{Sn})_5\text{O}_3\text{Cl}_5\}]$<br>( <i>X-ray Crystal Structure</i> ) | $[\{(\text{Et}_2\text{Sn})_5\text{O}_3\text{Cl}_5\}]$<br>( <i>DFT Optimized Geometry</i> ) |
|-------|---------------------------------------------------------------------------------------------|--------------------------------------------------------------------------------------------|
| Sn 1  | 1.78508                                                                                     | 1.84192                                                                                    |
| Sn 2  | 1.95514                                                                                     | 2.00537                                                                                    |
| Sn 3  | 2.05219                                                                                     | 2.13025                                                                                    |
| Sn 4  | 1.93530                                                                                     | 2.06758                                                                                    |
| Sn 5  | 1.78084                                                                                     | 1.83468                                                                                    |
| Cl 6  | -0.63949                                                                                    | -0.62018                                                                                   |
| Cl 7  | -0.64465                                                                                    | -0.64390                                                                                   |
| Cl 8  | -0.70959                                                                                    | -0.65812                                                                                   |
| Cl 9  | -0.64507                                                                                    | -0.63300                                                                                   |
| Cl 10 | -0.54498                                                                                    | -0.58640                                                                                   |
| O 11  | -1.22557                                                                                    | -1.24044                                                                                   |
| O 12  | -1.24093                                                                                    | -1.27413                                                                                   |
| O 13  | -1.20806                                                                                    | -1.23150                                                                                   |
| C 14  | -0.81986                                                                                    | -0.91465                                                                                   |
| H 15  | 0.22298                                                                                     | 0.26278                                                                                    |
| H 16  | 0.21947                                                                                     | 0.25247                                                                                    |
| C 17  | -0.59381                                                                                    | -0.69602                                                                                   |
| H 18  | 0.19628                                                                                     | 0.22540                                                                                    |
| H 19  | 0.19316                                                                                     | 0.22411                                                                                    |
| H 20  | 0.21484                                                                                     | 0.25002                                                                                    |
| C 21  | -0.82409                                                                                    | -0.90913                                                                                   |
| H 22  | 0.22584                                                                                     | 0.26354                                                                                    |
| H 23  | 0.21993                                                                                     | 0.25075                                                                                    |
| C 24  | -0.59078                                                                                    | -0.69559                                                                                   |
| H 25  | 0.20777                                                                                     | 0.25293                                                                                    |
| H 26  | 0.19240                                                                                     | 0.22456                                                                                    |
| H 27  | 0.20521                                                                                     | 0.22970                                                                                    |
| C 28  | -0.83599                                                                                    | -0.91690                                                                                   |
| H 29  | 0.21305                                                                                     | 0.24783                                                                                    |
| H 30  | 0.22318                                                                                     | 0.25682                                                                                    |
| C 31  | -0.59116                                                                                    | -0.69773                                                                                   |
| H 32  | 0.19180                                                                                     | 0.22406                                                                                    |
| H 33  | 0.21564                                                                                     | 0.24599                                                                                    |
| H 34  | 0.20454                                                                                     | 0.24139                                                                                    |
| C 35  | -0.82721                                                                                    | -0.92566                                                                                   |
| H 36  | 0.22553                                                                                     | 0.25880                                                                                    |
| H 37  | 0.21710                                                                                     | 0.26376                                                                                    |
| C 38  | -0.59235                                                                                    | -0.68590                                                                                   |
| H 39  | 0.19715                                                                                     | 0.22669                                                                                    |
| H 40  | 0.21215                                                                                     | 0.23741                                                                                    |
| H 41  | 0.19184                                                                                     | 0.22807                                                                                    |
| C 42  | -0.84398                                                                                    | -0.94948                                                                                   |
| H 43  | 0.22386                                                                                     | 0.25098                                                                                    |
| H 44  | 0.23401                                                                                     | 0.27725                                                                                    |
| C 45  | -0.59340                                                                                    | -0.68449                                                                                   |
| H 46  | 0.20042                                                                                     | 0.22761                                                                                    |
| H 47  | 0.20083                                                                                     | 0.22606                                                                                    |
| H 48  | 0.19517                                                                                     | 0.23880                                                                                    |
| C 49  | -0.84724                                                                                    | -0.94619                                                                                   |
| H 50  | 0.21028                                                                                     | 0.24383                                                                                    |
| H 51  | 0.23438                                                                                     | 0.27013                                                                                    |
| C 52  | -0.58762                                                                                    | -0.69112                                                                                   |
| H 53  | 0.19873                                                                                     | 0.22702                                                                                    |

## Supplementary Information

|      |          |          |
|------|----------|----------|
| H 54 | 0.19627  | 0.22810  |
| H 55 | 0.20234  | 0.24413  |
| C 56 | -0.81379 | -0.93305 |
| H 57 | 0.21378  | 0.24953  |
| H 58 | 0.23652  | 0.25248  |
| C 59 | -0.59406 | -0.69652 |
| H 60 | 0.19444  | 0.22567  |
| H 61 | 0.20245  | 0.23958  |
| H 62 | 0.20288  | 0.24662  |
| C 63 | -0.83362 | -0.93841 |
| H 64 | 0.22792  | 0.26019  |
| H 65 | 0.23529  | 0.26406  |
| C 66 | -0.59512 | -0.69590 |
| H 67 | 0.19876  | 0.22730  |
| H 68 | 0.20810  | 0.24682  |
| H 69 | 0.19559  | 0.23062  |
| C 70 | -0.81443 | -0.91044 |
| H 71 | 0.22340  | 0.25969  |
| H 72 | 0.23439  | 0.26031  |
| C 73 | -0.59044 | -0.69462 |
| H 74 | 0.19972  | 0.22462  |
| H 75 | 0.20156  | 0.23218  |
| H 76 | 0.20971  | 0.24937  |
| C 77 | -0.79974 | -0.90961 |
| H 78 | 0.23054  | 0.25745  |
| H 79 | 0.22375  | 0.25796  |
| C 80 | -0.59670 | -0.69284 |
| H 81 | 0.19855  | 0.22470  |
| H 82 | 0.20806  | 0.24621  |
| H 83 | 0.20364  | 0.23575  |

## Supplementary Information

Table S7. NBO computed NPA charges on DFT optimized geometry of  $[\text{Sn}(\text{CH}_3)_2\text{Cl}_2]$  complex and monomer model extracted from  $[\{(\text{Me}_2\text{Sn})_5\text{O}_3\text{Cl}_5\}]$  (see Sn@1 centre in Figure S1) unit of complex **2a**.

| $[\text{Sn}(\text{CH}_3)_2\text{Cl}_2]$<br>X-ray structure                                                                                                                                                                                                                                                                   | $[\text{Sn}(\text{CH}_3)_2\text{Cl}_2]$<br>X-ray structure Sn@1 center in<br>$[\{(\text{Me}_2\text{Sn})_5\text{O}_3\text{Cl}_5\}]$ unit                                                                                                                                                                                      |
|------------------------------------------------------------------------------------------------------------------------------------------------------------------------------------------------------------------------------------------------------------------------------------------------------------------------------|------------------------------------------------------------------------------------------------------------------------------------------------------------------------------------------------------------------------------------------------------------------------------------------------------------------------------|
| 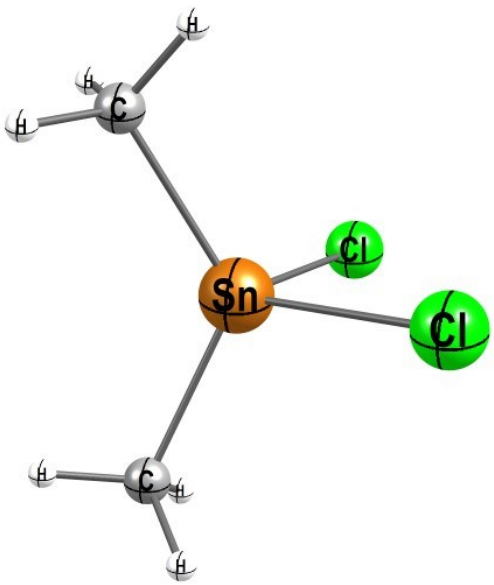                                                                                                                                                                                                                                           |                                                                                                                                                                                                                                           |
| <p>NPA CHARGES</p> <p>Sn 1 1.57567<br/>           Cl 2 -0.47170<br/>           Cl 3 -0.47136<br/>           C 4 -1.13078<br/>           H 5 0.26835<br/>           H 6 0.27740<br/>           H 7 0.26872<br/>           C 8 -1.13087<br/>           H 9 0.26841<br/>           H 10 0.26867<br/>           H 11 0.27749</p> | <p>NPA CHARGES</p> <p>Sn 1 1.64401<br/>           Cl 2 -0.55099<br/>           Cl 3 -0.54040<br/>           C 4 -0.99255<br/>           H 5 0.24061<br/>           H 6 0.24156<br/>           H 7 0.23941<br/>           C 8 -1.01046<br/>           H 9 0.24322<br/>           H 10 0.24258<br/>           H 11 0.24302</p> |

## Supplementary Information

Table S8. Second order perturbation theory calculated strength of donor acceptor interaction ( $n \rightarrow \sigma^*$ ) in [ $\{(\text{Me}_2\text{Sn})_5\text{O}_3\text{Cl}_5\}$ ] unit of complex **2a** along with the details of corresponding lone pair and antibonding orbital with its occupancy.

| Molecule                                              | <i>Donor</i>         | Acceptor<br>M-L* type    | Occupancy<br>( M-L*) | $\Delta E_{\text{M-L}^*}$<br>(kcal/mole) |
|-------------------------------------------------------|----------------------|--------------------------|----------------------|------------------------------------------|
| $[\{(\text{Me}_2\text{Sn})_5\text{O}_3\text{Cl}_5\}]$ | $n_{\text{Cl}}$ (LP) | $\sigma^*(\text{Sn-Cl})$ | 0.182                | 40.2                                     |
|                                                       | $n_{\text{O}}$ (LP)  | $\sigma^*(\text{Sn-Cl})$ | 0.154                | 32.5                                     |
|                                                       | $n_{\text{O}}$ (LP)  | $\sigma^*(\text{Sn-O})$  | 0.127                | 22.8                                     |
|                                                       | $n_{\text{O}}$ (LP)  | $\sigma^*(\text{Sn-O})$  | 0.153                | 19.41                                    |
|                                                       | $n_{\text{O}}$ (LP)  | $\sigma^*(\text{Sn-O})$  | 0.152                | 19.07                                    |
|                                                       | $n_{\text{Cl}}$ (LP) | $\sigma^*(\text{Sn-Cl})$ | 0.144                | 19.42                                    |

# Supplementary Information

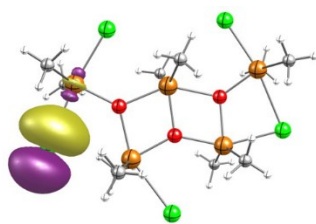

$n_{Cl}$

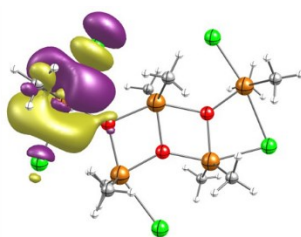

$\sigma^*_{Sn-Cl}$

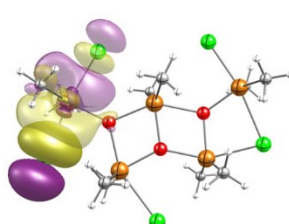

$n_{Cl}-\sigma^*_{Sn-Cl} \Delta E = 42.8 \text{ kcal/mole}$

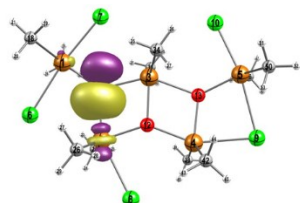

$n_O$

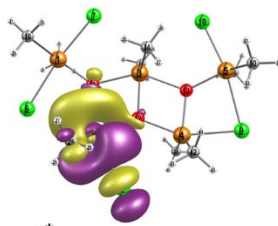

$\sigma^*_{Sn-Cl}$

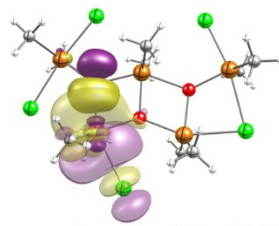

$n_O-\sigma^*_{Sn-Cl} \Delta E = 32.5 \text{ kcal/mole}$

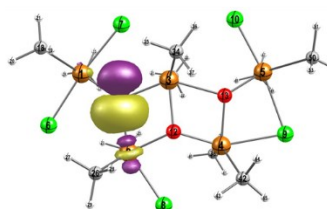

$n_O$

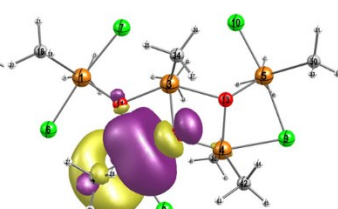

$\sigma^*_{Sn-O}$

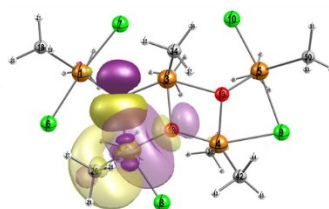

$n_O-\sigma^*_{Sn-O} \Delta E = 22.8 \text{ kcal/mole}$

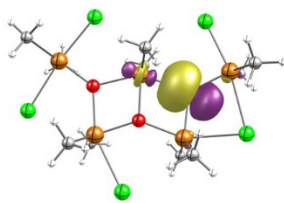

$n_O$

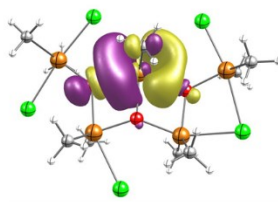

$\sigma^*_{Sn-O}$

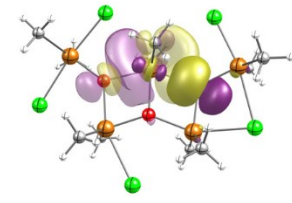

$n_O-\sigma^*_{Sn-O} \Delta E = 19.4 \text{ kcal/mole}$

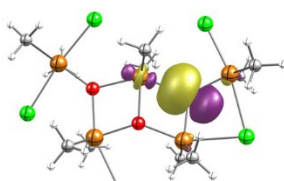

$n_O$

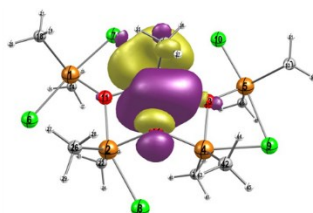

$\sigma^*_{Sn-O}$

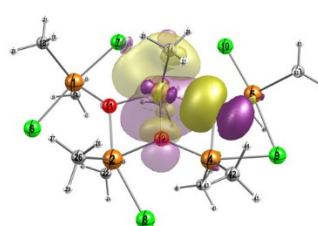

$n_O-\sigma^*_{Sn-O} \Delta E = 19.1 \text{ kcal/mole}$

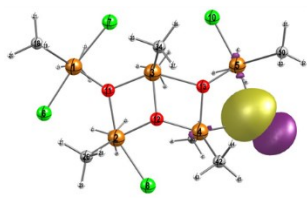

$n_{Cl}$

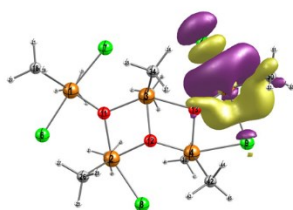

$\sigma^*_{Sn-O}$

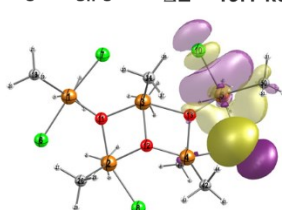

$n_{Cl}-\sigma^*_{Sn-O} \Delta E = 19.4 \text{ kcal/mole}$

## Supplementary Information

Figure S3. Second order perturbation theory computed six most stabilizing interactions present in  $\{(Me_2Sn)_5O_3Cl_5\}$  core of complex **2a**. These three dimensional contour plots are arranged according to the interactions present in Table S8.

Table S9. EDA analysis of  $\{(Me_2Sn)_5O_3Cl_5\}$  fragment of complex **2a** along with decomposed orbital interaction energy ( $E_{orb}$ ) for all the three fragments.

| Fragments                                     | $E_{int}$<br>(kcal/mole)                            | $E_{orb}$<br>(kcal/mole)                           | $E_{steric}$<br>(kcal/mole) |
|-----------------------------------------------|-----------------------------------------------------|----------------------------------------------------|-----------------------------|
| $\{(Me_2Sn)_4O_5Cl_3\} \dots \{Sn@Cl_2Me_2\}$ | -102.5                                              | -105.8                                             | 3.34                        |
|                                               | <i>Decomposed <math>E_{orb}</math> interactions</i> |                                                    |                             |
|                                               |                                                     | -66.0<br>-11.3<br>-9.3                             |                             |
| $\{(Me_2Sn)_4O_5Cl_5\} \dots \{Sn@3Me_2\}$    | -705.1                                              | -254.2                                             | -450.8                      |
|                                               | <i>Decomposed <math>E_{orb}</math> interactions</i> |                                                    |                             |
|                                               |                                                     | -74.2<br>-43.7<br>-20.0<br>-14.0<br>-10.7<br>-10.9 |                             |
|                                               |                                                     |                                                    |                             |
|                                               |                                                     |                                                    |                             |
| $\{(Me_2Sn)_4O_5Cl_4\} \dots \{Sn@2ClMe_2\}$  | -313.5                                              | -176.8                                             | -136.7                      |
|                                               | <i>Decomposed <math>E_{orb}</math> interactions</i> |                                                    |                             |
|                                               |                                                     | -78.4<br>-30.9<br>-11.6                            |                             |

## Supplementary Information

Table S10. Second order perturbation theory calculated strength of donor acceptor interaction ( $n \rightarrow \sigma^*$ ) in  $\{(\text{Et}_2\text{Sn})_5\text{O}_3\text{Cl}_5\}$  unit of complex **2b** along with details of corresponding lone pair and antibonding orbital with its occupancy.

| Molecule                                            | Donor                      | Acceptor<br>M-L* type    | Occupancy<br>( M-L* ) | $\Delta E_{\text{M-L}^*}$<br>(kcal/mole) |
|-----------------------------------------------------|----------------------------|--------------------------|-----------------------|------------------------------------------|
| $\{(\text{Et}_2\text{Sn})_5\text{O}_3\text{Cl}_5\}$ | $n_{\text{O}}(\text{LP})$  | $\sigma^*(\text{Sn-Cl})$ | 0.218                 | 47.1                                     |
|                                                     | $n_{\text{O}}(\text{LP})$  | $\sigma^*(\text{Sn-Cl})$ | 0.216                 | 41.7                                     |
|                                                     | $n_{\text{O}}(\text{LP})$  | $\sigma^*(\text{Sn-Cl})$ | 0.154                 | 32.3                                     |
|                                                     | $n_{\text{O}}(\text{LP})$  | $\sigma^*(\text{Sn-O})$  | 0.138                 | 20.7                                     |
|                                                     | $n_{\text{O}}(\text{LP})$  | $\sigma^*(\text{Sn-O})$  | 0.161                 | 18.3                                     |
|                                                     | $n_{\text{O}}(\text{LP})$  | $\sigma^*(\text{Sn-O})$  | 0.158                 | 18.8                                     |
|                                                     | $n_{\text{Cl}}(\text{LP})$ | $\sigma^*(\text{SnCl})$  | 0.153                 | 24.9                                     |



## Supplementary Information

Table S11. NBO computed NPA charges on DFT optimized geometry of  $[\{\text{PtCl}(\text{SeC}_5\text{H}_4\text{N})(\text{dppp})\}]$  fragment of complex **2b**.

| $[\{\text{PtCl}(\text{SeC}_5\text{H}_4\text{N})(\text{dppp})\}]$ |                 |
|------------------------------------------------------------------|-----------------|
| <b>Pt 1</b>                                                      | <b>0.11302</b>  |
| <b>P 2</b>                                                       | <b>1.05853</b>  |
| <b>P 3</b>                                                       | <b>1.03011</b>  |
| <b>Se 4</b>                                                      | <b>-0.10529</b> |
| <b>Cl 5</b>                                                      | <b>-0.49317</b> |
| <b>N 6</b>                                                       | <b>-0.54813</b> |
| C 7                                                              | -0.34010        |
| C 8                                                              | -0.22528        |
| H 9                                                              | 0.25674         |
| C 10                                                             | -0.22507        |
| H 11                                                             | 0.24526         |
| C 12                                                             | -0.22626        |
| H 13                                                             | 0.24214         |
| C 14                                                             | -0.22762        |
| H 15                                                             | 0.24237         |
| C 16                                                             | -0.22127        |
| H 17                                                             | 0.25087         |
| C 18                                                             | -0.36214        |
| C 19                                                             | -0.19842        |
| H 20                                                             | 0.26962         |
| C 21                                                             | -0.23246        |
| H 22                                                             | 0.24667         |
| C 23                                                             | -0.22666        |
| H 24                                                             | 0.24117         |
| C 25                                                             | -0.23303        |
| H 26                                                             | 0.24208         |
| C 27                                                             | -0.22433        |
| H 28                                                             | 0.23490         |
| C 29                                                             | -0.75946        |
| H 30                                                             | 0.27528         |
| H 31                                                             | 0.27093         |
| C 32                                                             | -0.47401        |
| H 33                                                             | 0.24746         |
| H 34                                                             | 0.25631         |
| C 35                                                             | -0.74837        |
| H 36                                                             | 0.26690         |
| H 37                                                             | 0.27213         |
| C 38                                                             | -0.36579        |
| C 39                                                             | -0.23876        |
| H 40                                                             | 0.24062         |
| C 41                                                             | -0.23968        |
| H 42                                                             | 0.24151         |
| C 43                                                             | -0.21981        |
| H 44                                                             | 0.24084         |
| C 45                                                             | -0.22722        |
| H 46                                                             | 0.24554         |
| C 47                                                             | -0.20927        |
| H 48                                                             | 0.28234         |
| C 49                                                             | -0.33700        |
| C 50                                                             | -0.21969        |
| H 51                                                             | 0.24976         |
| C 52                                                             | -0.23188        |
| H 53                                                             | 0.24110         |
| C 54                                                             | -0.22528        |
| H 55                                                             | 0.24077         |

## Supplementary Information

|      |          |
|------|----------|
| C 56 | -0.22843 |
| H 57 | 0.24313  |
| C 58 | -0.20564 |
| H 59 | 0.25210  |
| C 60 | -0.27795 |
| H 61 | 0.24977  |
| C 62 | -0.20287 |
| H 63 | 0.24087  |
| C 64 | -0.30198 |
| H 65 | 0.24006  |
| C 66 | 0.04743  |
| H 67 | 0.21386  |
| C 68 | 0.07016  |

## Supplementary Information

### DFT optimized geometries

#### **[{Pt( $\kappa_2$ -SeC<sub>5</sub>H<sub>4</sub>N)(dppp)}] unit of complex 2a**

$$E_{\text{SCF}} = -4495.39087860 \text{ Eh}$$

$$G = -4494.93057201 \text{ Eh}$$

|    |                 |                 |                 |
|----|-----------------|-----------------|-----------------|
| Pt | 8.660687000000  | 2.061076000000  | 3.564174000000  |
| Se | 10.874042000000 | 3.230703000000  | 3.613252000000  |
| P  | 8.980038000000  | 0.779256000000  | 5.403547000000  |
| P  | 6.571942000000  | 1.162657000000  | 3.315585000000  |
| N  | 8.889371000000  | 3.227011000000  | 1.806942000000  |
| C  | 10.131585000000 | 3.778197000000  | 1.944099000000  |
| C  | 10.680488000000 | 4.590407000000  | 0.938527000000  |
| H  | 11.679586000000 | 5.027583000000  | 1.073588000000  |
| C  | 9.928514000000  | 4.809021000000  | -0.222826000000 |
| H  | 10.333380000000 | 5.440772000000  | -1.028047000000 |
| C  | 8.660396000000  | 4.211259000000  | -0.361255000000 |
| H  | 8.053379000000  | 4.356100000000  | -1.265031000000 |
| C  | 8.169993000000  | 3.418793000000  | 0.681057000000  |
| H  | 7.188764000000  | 2.928953000000  | 0.630032000000  |
| C  | 10.305804000000 | 1.390854000000  | 6.499224000000  |
| C  | 10.286670000000 | 2.750312000000  | 6.883410000000  |
| H  | 9.507780000000  | 3.424815000000  | 6.494786000000  |
| C  | 11.277697000000 | 3.245115000000  | 7.743419000000  |
| H  | 11.264441000000 | 4.304793000000  | 8.038412000000  |
| C  | 12.290745000000 | 2.391869000000  | 8.214639000000  |
| H  | 13.072385000000 | 2.784534000000  | 8.882061000000  |
| C  | 12.310703000000 | 1.040795000000  | 7.830302000000  |
| H  | 13.105467000000 | 0.373914000000  | 8.196485000000  |
| C  | 11.319445000000 | 0.534348000000  | 6.974552000000  |
| H  | 11.338834000000 | -0.522920000000 | 6.671785000000  |
| C  | 9.489786000000  | -0.882887000000 | 4.849126000000  |
| C  | 10.550301000000 | -0.951993000000 | 3.916044000000  |
| H  | 11.045234000000 | -0.026192000000 | 3.580895000000  |
| C  | 10.962898000000 | -2.194436000000 | 3.417643000000  |
| H  | 11.795361000000 | -2.244615000000 | 2.699955000000  |
| C  | 10.309315000000 | -3.370906000000 | 3.826586000000  |
| H  | 10.626425000000 | -4.344906000000 | 3.424732000000  |
| C  | 9.254937000000  | -3.304115000000 | 4.750768000000  |
| H  | 8.744914000000  | -4.222963000000 | 5.075646000000  |
| C  | 8.849986000000  | -2.064169000000 | 5.271508000000  |
| H  | 8.034363000000  | -2.032440000000 | 6.006994000000  |
| C  | 7.543306000000  | 0.594791000000  | 6.554198000000  |
| H  | 7.867625000000  | -0.097446000000 | 7.358839000000  |
| H  | 7.449857000000  | 1.595325000000  | 7.027529000000  |
| C  | 6.200160000000  | 0.153266000000  | 5.954998000000  |
| H  | 6.283947000000  | -0.866986000000 | 5.527733000000  |
| H  | 5.472332000000  | 0.073612000000  | 6.789502000000  |
| C  | 5.608552000000  | 1.094608000000  | 4.898016000000  |

## Supplementary Information

|   |                |                 |                 |
|---|----------------|-----------------|-----------------|
| H | 5.554574000000 | 2.139516000000  | 5.269287000000  |
| H | 4.571737000000 | 0.795026000000  | 4.642868000000  |
| C | 6.609273000000 | -0.552328000000 | 2.693781000000  |
| C | 7.766416000000 | -0.992263000000 | 2.016988000000  |
| H | 8.603723000000 | -0.292423000000 | 1.871205000000  |
| C | 7.853499000000 | -2.314823000000 | 1.560505000000  |
| H | 8.760527000000 | -2.652707000000 | 1.039043000000  |
| C | 6.790552000000 | -3.205928000000 | 1.782627000000  |
| H | 6.862982000000 | -4.246719000000 | 1.433012000000  |
| C | 5.632303000000 | -2.770807000000 | 2.450142000000  |
| H | 4.797023000000 | -3.467029000000 | 2.618007000000  |
| C | 5.536546000000 | -1.446261000000 | 2.903361000000  |
| H | 4.621194000000 | -1.115553000000 | 3.417094000000  |
| C | 5.497215000000 | 2.127015000000  | 2.199285000000  |
| C | 4.933735000000 | 1.560990000000  | 1.037552000000  |
| H | 5.098453000000 | 0.498131000000  | 0.806075000000  |
| C | 4.172741000000 | 2.364919000000  | 0.171946000000  |
| H | 3.735220000000 | 1.924220000000  | -0.736371000000 |
| C | 3.970562000000 | 3.724319000000  | 0.463813000000  |
| H | 3.374885000000 | 4.349917000000  | -0.217713000000 |
| C | 4.530706000000 | 4.288133000000  | 1.624769000000  |
| H | 4.376981000000 | 5.353713000000  | 1.851237000000  |
| C | 5.298328000000 | 3.495723000000  | 2.489361000000  |
| H | 5.769673000000 | 3.948021000000  | 3.376506000000  |

### {Me<sub>10</sub>Sn<sub>5</sub>(μ-O)<sub>3</sub>(μ-Cl)Cl<sub>4</sub>} unit of complex 2a

$$E_{\text{SCF}} = -3998.50308706 \text{ Eh}$$

$$G = -3998.21294200 \text{ Eh}$$

|    |                 |                 |                |
|----|-----------------|-----------------|----------------|
| Sn | 3.539601000000  | 9.465115000000  | 7.349425000000 |
| Sn | 5.529300000000  | 6.348476000000  | 6.387937000000 |
| Sn | 6.858948000000  | 9.403912000000  | 5.813783000000 |
| Sn | 8.767952000000  | 6.879965000000  | 4.492600000000 |
| Sn | 10.026890000000 | 10.055910000000 | 3.507978000000 |
| Cl | 2.413090000000  | 7.233159000000  | 7.877523000000 |
| Cl | 4.958150000000  | 11.589076000000 | 6.728332000000 |
| Cl | 6.841445000000  | 4.280972000000  | 5.522554000000 |
| Cl | 10.947532000000 | 7.521708000000  | 2.867810000000 |
| Cl | 8.957680000000  | 12.131343000000 | 4.347821000000 |
| O  | 5.190693000000  | 8.471176000000  | 6.782016000000 |
| O  | 7.214103000000  | 7.334962000000  | 5.786761000000 |
| O  | 8.840710000000  | 8.928028000000  | 4.656337000000 |
| C  | 2.166563000000  | 9.856383000000  | 5.744286000000 |
| H  | 2.302257000000  | 10.891421000000 | 5.383148000000 |
| H  | 1.133438000000  | 9.678339000000  | 6.095533000000 |
| H  | 2.404042000000  | 9.133619000000  | 4.941006000000 |
| C  | 3.533863000000  | 10.086894000000 | 9.403397000000 |
| H  | 4.540445000000  | 9.860894000000  | 9.803051000000 |
| H  | 2.766817000000  | 9.518767000000  | 9.959696000000 |
| H  | 3.358240000000  | 11.176882000000 | 9.455341000000 |

## Supplementary Information

|   |                 |                 |                |
|---|-----------------|-----------------|----------------|
| C | 4.089221000000  | 6.258509000000  | 4.806839000000 |
| H | 3.093758000000  | 6.484656000000  | 5.230251000000 |
| H | 4.113225000000  | 5.260485000000  | 4.334943000000 |
| H | 4.378698000000  | 7.037383000000  | 4.075819000000 |
| C | 5.669937000000  | 5.760635000000  | 8.433740000000 |
| H | 4.868276000000  | 6.268624000000  | 8.998164000000 |
| H | 6.669261000000  | 6.083310000000  | 8.782018000000 |
| H | 5.581256000000  | 4.662296000000  | 8.509233000000 |
| C | 5.979333000000  | 9.866522000000  | 3.925628000000 |
| H | 4.892333000000  | 10.004723000000 | 4.057867000000 |
| H | 6.193495000000  | 9.024021000000  | 3.241552000000 |
| H | 6.441339000000  | 10.797052000000 | 3.549962000000 |
| C | 8.014615000000  | 10.154849000000 | 7.430557000000 |
| H | 7.344642000000  | 10.342231000000 | 8.287363000000 |
| H | 8.496822000000  | 11.091189000000 | 7.098163000000 |
| H | 8.775741000000  | 9.389221000000  | 7.668925000000 |
| C | 7.730716000000  | 6.336478000000  | 2.706026000000 |
| H | 7.802559000000  | 7.188022000000  | 2.004672000000 |
| H | 6.681733000000  | 6.110949000000  | 2.967388000000 |
| H | 8.208348000000  | 5.445684000000  | 2.260232000000 |
| C | 10.124449000000 | 5.911439000000  | 5.820498000000 |
| H | 9.525923000000  | 5.330863000000  | 6.544850000000 |
| H | 10.710302000000 | 6.702592000000  | 6.324345000000 |
| H | 10.800680000000 | 5.252982000000  | 5.246989000000 |
| C | 9.326860000000  | 10.246915000000 | 1.488077000000 |
| H | 9.440191000000  | 11.296733000000 | 1.160303000000 |
| H | 8.252454000000  | 9.983353000000  | 1.500386000000 |
| H | 9.880857000000  | 9.552500000000  | 0.831868000000 |
| C | 11.979265000000 | 10.420364000000 | 4.316850000000 |
| H | 12.080610000000 | 11.494614000000 | 4.555458000000 |
| H | 12.745962000000 | 10.089831000000 | 3.592662000000 |
| H | 12.062206000000 | 9.812961000000  | 5.237275000000 |

### {Et<sub>10</sub>Sn<sub>5</sub>(μ-O)<sub>3</sub>(μ-Cl)Cl<sub>4</sub>} unit of complex 2b

$$E_{\text{SCF}} = -4391.37982848 \text{ Eh}$$

$$G = -4390.81738641 \text{ Eh}$$

|    |                 |                 |                 |
|----|-----------------|-----------------|-----------------|
| Sn | 9.910206000000  | 5.135761000000  | 12.060805000000 |
| Sn | 9.359110000000  | 8.806060000000  | 12.675273000000 |
| Sn | 6.609699000000  | 6.857328000000  | 12.195383000000 |
| Sn | 5.799740000000  | 10.103569000000 | 12.896733000000 |
| Sn | 2.890099000000  | 8.039316000000  | 12.560537000000 |
| Cl | 7.644800000000  | 3.869648000000  | 11.880022000000 |
| Cl | 11.955635000000 | 6.702918000000  | 12.394384000000 |
| Cl | 8.807318000000  | 11.359533000000 | 13.148181000000 |
| Cl | 3.045651000000  | 10.676022000000 | 13.352411000000 |
| Cl | 3.219490000000  | 5.694573000000  | 11.782920000000 |
| O  | 8.761203000000  | 6.746772000000  | 12.386309000000 |
| O  | 7.329682000000  | 8.805785000000  | 12.400341000000 |

## Supplementary Information

|   |                 |                 |                 |
|---|-----------------|-----------------|-----------------|
| O | 4.852488000000  | 8.359743000000  | 12.325116000000 |
| C | 10.339000000000 | 4.909317000000  | 9.949332000000  |
| H | 9.513841000000  | 4.292406000000  | 9.542941000000  |
| H | 10.233090000000 | 5.936980000000  | 9.545192000000  |
| C | 11.721205000000 | 4.327979000000  | 9.654014000000  |
| H | 11.925083000000 | 4.292129000000  | 8.560801000000  |
| H | 11.822396000000 | 3.290190000000  | 10.036646000000 |
| H | 12.519148000000 | 4.937538000000  | 10.125362000000 |
| C | 10.544865000000 | 3.887001000000  | 13.722446000000 |
| H | 9.727380000000  | 3.150913000000  | 13.849238000000 |
| H | 11.435897000000 | 3.349223000000  | 13.335422000000 |
| C | 10.870405000000 | 4.642331000000  | 15.009005000000 |
| H | 11.644880000000 | 5.415308000000  | 14.833067000000 |
| H | 11.246854000000 | 3.951266000000  | 15.795439000000 |
| H | 9.976222000000  | 5.151528000000  | 15.420774000000 |
| C | 9.983321000000  | 8.560053000000  | 14.722175000000 |
| H | 9.098832000000  | 8.861755000000  | 15.319479000000 |
| H | 10.140016000000 | 7.472050000000  | 14.841834000000 |
| C | 11.225279000000 | 9.369846000000  | 15.084764000000 |
| H | 11.487631000000 | 9.247845000000  | 16.158812000000 |
| H | 11.066565000000 | 10.451703000000 | 14.897909000000 |
| H | 12.101040000000 | 9.037898000000  | 14.490077000000 |
| C | 10.205778000000 | 9.231455000000  | 10.740729000000 |
| H | 10.959168000000 | 10.028379000000 | 10.896648000000 |
| H | 10.740738000000 | 8.308732000000  | 10.446651000000 |
| C | 9.125809000000  | 9.646399000000  | 9.744838000000  |
| H | 9.561271000000  | 9.872769000000  | 8.746911000000  |
| H | 8.586521000000  | 10.551924000000 | 10.088844000000 |
| H | 8.368739000000  | 8.849192000000  | 9.604224000000  |
| C | 6.380241000000  | 6.502027000000  | 10.087402000000 |
| H | 7.423376000000  | 6.391857000000  | 9.729048000000  |
| H | 5.892928000000  | 5.512726000000  | 10.007533000000 |
| C | 5.616296000000  | 7.593626000000  | 9.346637000000  |
| H | 5.582971000000  | 7.385682000000  | 8.254632000000  |
| H | 6.084014000000  | 8.589830000000  | 9.480814000000  |
| H | 4.572740000000  | 7.668120000000  | 9.708658000000  |
| C | 6.037035000000  | 6.146208000000  | 14.148396000000 |
| H | 5.498626000000  | 7.010137000000  | 14.585881000000 |
| H | 5.295673000000  | 5.346682000000  | 13.957550000000 |
| C | 7.191835000000  | 5.678037000000  | 15.024848000000 |
| H | 6.830998000000  | 5.362929000000  | 16.028441000000 |
| H | 7.946149000000  | 6.475399000000  | 15.176190000000 |
| H | 7.706661000000  | 4.811446000000  | 14.565761000000 |
| C | 5.989733000000  | 10.150880000000 | 15.041895000000 |
| H | 5.183075000000  | 9.488830000000  | 15.415604000000 |
| H | 6.966749000000  | 9.668896000000  | 15.242841000000 |
| C | 5.907352000000  | 11.554865000000 | 15.635879000000 |
| H | 6.000536000000  | 11.532013000000 | 16.743931000000 |
| H | 4.937548000000  | 12.036416000000 | 15.393688000000 |
| H | 6.724540000000  | 12.195936000000 | 15.246650000000 |

## Supplementary Information

|   |                |                 |                 |
|---|----------------|-----------------|-----------------|
| C | 5.784997000000 | 11.555687000000 | 11.307634000000 |
| H | 5.694080000000 | 12.541666000000 | 11.804811000000 |
| H | 6.808982000000 | 11.489354000000 | 10.892648000000 |
| C | 4.694659000000 | 11.332324000000 | 10.263151000000 |
| H | 4.749271000000 | 12.098814000000 | 9.459247000000  |
| H | 3.686786000000 | 11.389522000000 | 10.720542000000 |
| H | 4.786603000000 | 10.338968000000 | 9.780590000000  |
| C | 1.685140000000 | 8.762096000000  | 10.908905000000 |
| H | 0.937252000000 | 9.431030000000  | 11.380284000000 |
| H | 2.387357000000 | 9.415030000000  | 10.353509000000 |
| C | 1.053858000000 | 7.697150000000  | 10.016245000000 |
| H | 0.482222000000 | 8.163656000000  | 9.183443000000  |
| H | 0.353576000000 | 7.044854000000  | 10.577303000000 |
| H | 1.818638000000 | 7.028931000000  | 9.573829000000  |
| C | 2.326586000000 | 7.640785000000  | 14.618195000000 |
| H | 3.151299000000 | 8.105598000000  | 15.195627000000 |
| H | 1.431482000000 | 8.271863000000  | 14.793091000000 |
| C | 2.104065000000 | 6.178548000000  | 14.992842000000 |
| H | 1.834324000000 | 6.079907000000  | 16.067704000000 |
| H | 3.011393000000 | 5.569284000000  | 14.813936000000 |
| H | 1.291562000000 | 5.714776000000  | 14.397708000000 |

### **[{PtCl(SeC<sub>5</sub>H<sub>4</sub>N)(dppp)}] unit of complex 2b**

$$E_{\text{SCF}} = -4955.85449364 \text{ Eh}$$

$$G = -4955.39780556 \text{ Eh}$$

|    |                |                 |                 |
|----|----------------|-----------------|-----------------|
| Pt | 4.919413000000 | 16.410809000000 | 5.049215000000  |
| P  | 4.644988000000 | 15.896186000000 | 2.881490000000  |
| P  | 2.818147000000 | 17.289685000000 | 5.145800000000  |
| Se | 7.031896000000 | 15.046752000000 | 5.052592000000  |
| Cl | 5.288401000000 | 16.933717000000 | 7.321049000000  |
| N  | 5.070123000000 | 13.560323000000 | 6.445450000000  |
| C  | 6.189837000000 | 15.783122000000 | 1.898786000000  |
| C  | 7.201930000000 | 16.736567000000 | 2.138866000000  |
| H  | 7.069559000000 | 17.478830000000 | 2.943307000000  |
| C  | 8.380878000000 | 16.711415000000 | 1.381084000000  |
| H  | 9.173360000000 | 17.448657000000 | 1.579937000000  |
| C  | 8.556661000000 | 15.735331000000 | 0.384046000000  |
| H  | 9.487557000000 | 15.709634000000 | -0.202759000000 |
| C  | 7.548255000000 | 14.787624000000 | 0.143597000000  |
| H  | 7.686981000000 | 14.018522000000 | -0.631671000000 |
| C  | 6.362481000000 | 14.810559000000 | 0.896099000000  |
| H  | 5.577469000000 | 14.060100000000 | 0.718359000000  |
| C  | 3.791387000000 | 14.291263000000 | 2.647200000000  |
| C  | 4.347870000000 | 13.164778000000 | 3.292639000000  |
| H  | 5.285509000000 | 13.280573000000 | 3.857836000000  |
| C  | 3.697927000000 | 11.926061000000 | 3.224008000000  |
| H  | 4.138660000000 | 11.056174000000 | 3.734084000000  |
| C  | 2.482768000000 | 11.800936000000 | 2.527682000000  |

## Supplementary Information

|   |                 |                 |                |
|---|-----------------|-----------------|----------------|
| H | 1.964312000000  | 10.830492000000 | 2.490364000000 |
| C | 1.928296000000  | 12.917779000000 | 1.882797000000 |
| H | 0.976339000000  | 12.827565000000 | 1.338208000000 |
| C | 2.583721000000  | 14.158681000000 | 1.933585000000 |
| H | 2.136340000000  | 15.020142000000 | 1.419443000000 |
| C | 3.715490000000  | 17.144278000000 | 1.859841000000 |
| H | 4.424273000000  | 17.996784000000 | 1.791070000000 |
| H | 3.637012000000  | 16.724137000000 | 0.835254000000 |
| C | 2.345714000000  | 17.632863000000 | 2.352867000000 |
| H | 1.628941000000  | 16.787384000000 | 2.402058000000 |
| H | 1.942341000000  | 18.327735000000 | 1.585004000000 |
| C | 2.344032000000  | 18.361241000000 | 3.702335000000 |
| H | 1.342699000000  | 18.791205000000 | 3.909753000000 |
| H | 3.062655000000  | 19.207710000000 | 3.708465000000 |
| C | 1.616171000000  | 15.904125000000 | 5.082921000000 |
| C | 0.279245000000  | 16.093841000000 | 4.670798000000 |
| H | -0.093622000000 | 17.101868000000 | 4.431816000000 |
| C | -0.586299000000 | 14.994214000000 | 4.562672000000 |
| H | -1.626216000000 | 15.146267000000 | 4.235039000000 |
| C | -0.123079000000 | 13.703044000000 | 4.870175000000 |
| H | -0.799990000000 | 12.840056000000 | 4.775018000000 |
| C | 1.202727000000  | 13.515114000000 | 5.292452000000 |
| H | 1.572913000000  | 12.505112000000 | 5.521412000000 |
| C | 2.077420000000  | 14.607546000000 | 5.398636000000 |
| H | 3.131907000000  | 14.453296000000 | 5.699864000000 |
| C | 2.351998000000  | 18.330468000000 | 6.573792000000 |
| C | 1.247294000000  | 18.028727000000 | 7.391944000000 |
| H | 0.646826000000  | 17.128084000000 | 7.196883000000 |
| C | 0.923522000000  | 18.873361000000 | 8.466989000000 |
| H | 0.062467000000  | 18.631793000000 | 9.108826000000 |
| C | 1.698284000000  | 20.015148000000 | 8.725998000000 |
| H | 1.444421000000  | 20.672940000000 | 9.571351000000 |
| C | 2.809854000000  | 20.308780000000 | 7.916134000000 |
| H | 3.433531000000  | 21.189612000000 | 8.131305000000 |
| C | 3.145307000000  | 19.464357000000 | 6.849537000000 |
| H | 4.043772000000  | 19.664375000000 | 6.246047000000 |
| C | 7.338396000000  | 13.003303000000 | 7.070038000000 |
| H | 8.414526000000  | 13.195665000000 | 6.950224000000 |
| C | 6.868761000000  | 12.042451000000 | 7.969467000000 |
| H | 7.579439000000  | 11.451539000000 | 8.568591000000 |
| C | 5.480345000000  | 11.856418000000 | 8.114869000000 |
| H | 5.068277000000  | 11.121806000000 | 8.822161000000 |
| C | 4.631806000000  | 12.647887000000 | 7.328343000000 |
| H | 3.534059000000  | 12.546466000000 | 7.411367000000 |
| C | 6.398743000000  | 13.753171000000 | 6.320146000000 |



## Supplementary Information

### [SnCl<sub>2</sub>(CH<sub>3</sub>)<sub>2</sub>] complex

$$E_{\text{SCF}} = -1214.48235559 \text{ Eh}$$

$$G = -1214.44720980 \text{ Eh}$$

|    |                |                 |                |
|----|----------------|-----------------|----------------|
| Cl | 2.291009449009 | 1.864507083967  | 3.943268424108 |
| Sn | 4.331415782309 | 1.925017971268  | 2.709764033067 |
| Cl | 6.096384395913 | 1.926106112793  | 4.313790491339 |
| C  | 4.467219602733 | 0.067137912128  | 1.612438953779 |
| H  | 5.423323623064 | 0.043205546707  | 1.055769491053 |
| H  | 4.430979976547 | -0.766480256900 | 2.337895536192 |
| H  | 3.613267332190 | -0.003084727202 | 0.912167509350 |
| C  | 4.400819794029 | 3.826812977834  | 1.683798936695 |
| H  | 5.356916045330 | 3.906894558143  | 1.132376615985 |
| H  | 3.546897079173 | 3.891613743221  | 0.982959546718 |
| H  | 4.331764919704 | 4.630769078041  | 2.439704461713 |
